# Supplementary material for: A dual endosymbiosis supports nutritional adaptation to hematophagy in the invasive tick Hyalomma marginatum
Source: eLife. 2021 Dec 24;10:e72747. doi: 10.7554/eLife.72747 (PMC8709577; doi:10.7554/eLife.72747)
Supplement: Figure 6—source data 1. [file elife-72747-fig6-data1.xlsx]

## Sheet: Feuil1
indiv	Midiratio	Francisratio
Hm101	0.355708	4.85726
Hm1	110.086	739.106
Hm2	77.7246	1134.55
Hm3	147.469	921.552
Hm4	208.374	1209.14
Hm5	157.398	1419.48
Hm103	8.17911	56.7785
Hm104	0.151772	3.25391
